# Supplementary material for: De novo assembly and characterization of tissue specific transcriptomes in the emerald notothen, Trematomus bernacchii
Source: PubMed Central journal article supplement (PMC3840625; doi:10.1186/1471-2164-14-805), 2013-11-20

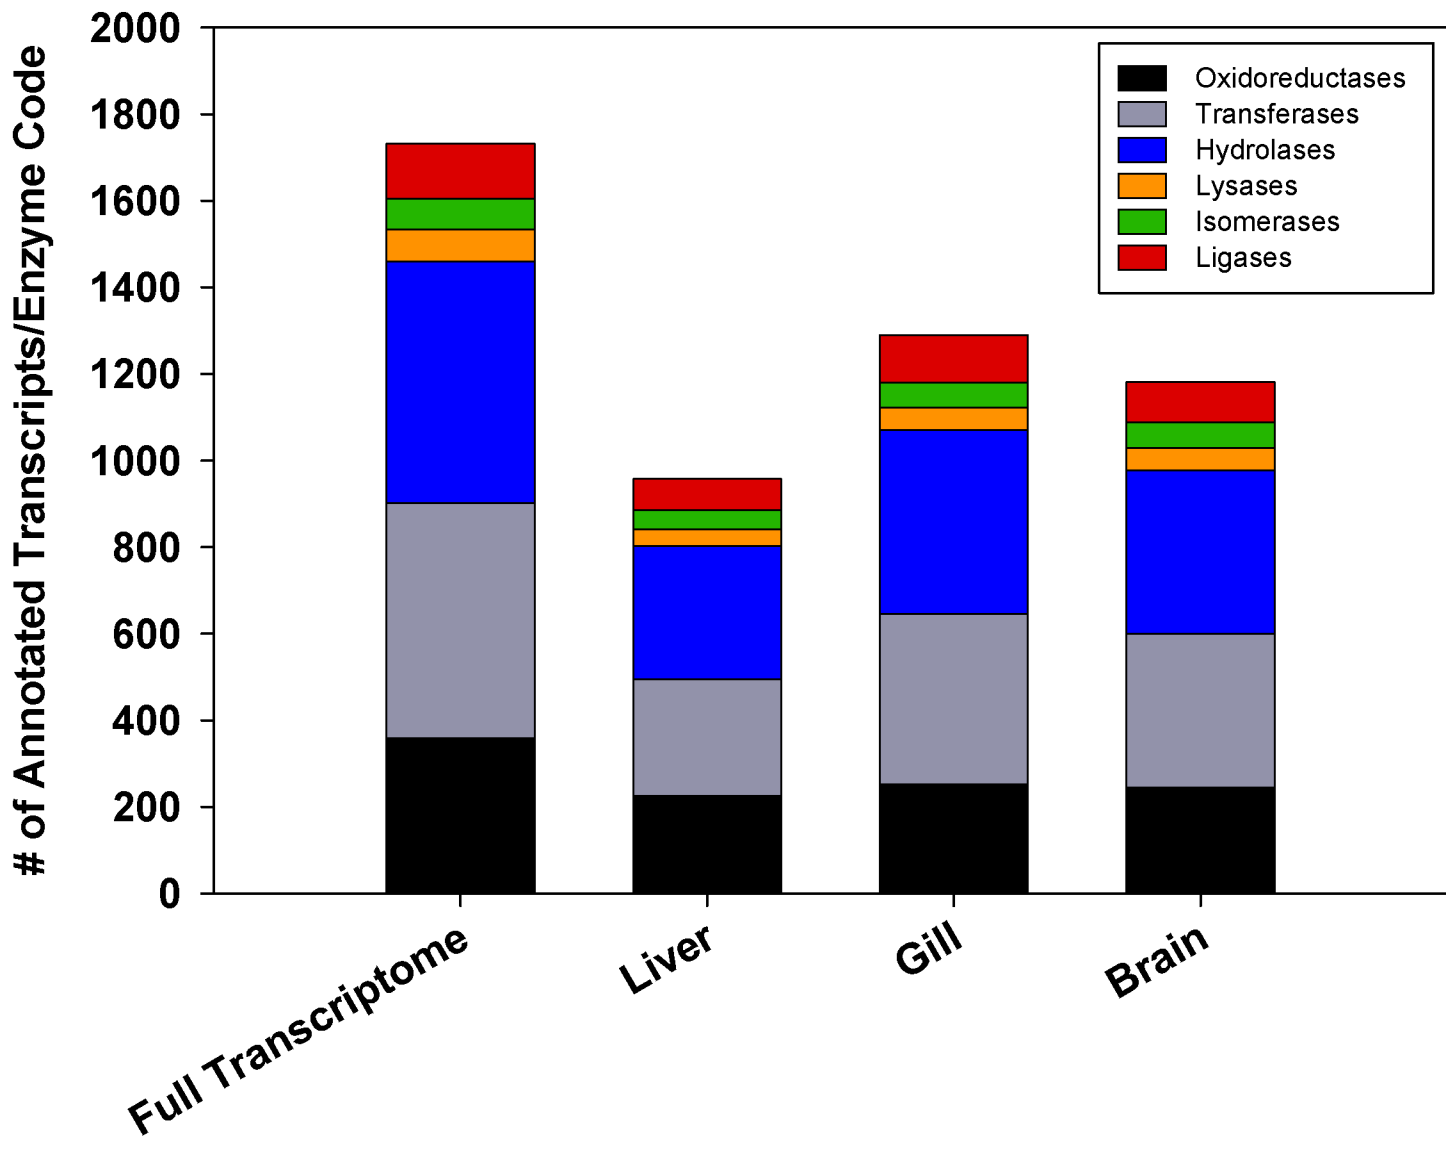

Supplement: 1471-2164-14-805-S5.pdf [file 1471-2164-14-805-S5.pdf]
